# Supplementary material for: Non-Coding RNAs as Biomarkers for Embryo Quality and Pregnancy Outcomes: A Systematic Review and Meta-Analysis
Source: MDPI journal article supplement (doi:10.3390/ijms24065751), 2023-03-17
Supplement: s1 [file s1]

**Table S1: Search strategy for databases**

| Database                                                                                                                                     | Search Terms                                             |
|----------------------------------------------------------------------------------------------------------------------------------------------|----------------------------------------------------------|
| <p>PubMed<br/>(<a href="https://www.ncbi.nlm.nih.gov/pubmed">https://www.ncbi.nlm.nih.gov/pubmed</a>)<br/>Last search date: 31 July 2022</p> | 1. “RNA, Untranslated” [Mesh]                            |
|                                                                                                                                              | 2. “RNA, Small Untranslated” [Mesh]                      |
|                                                                                                                                              | 3. “MicroRNAs” [Mesh]                                    |
|                                                                                                                                              | 4. “Circulating MicroRNA” [Mesh]                         |
|                                                                                                                                              | 5. “non-coding RNA*”                                     |
|                                                                                                                                              | 6. “noncoding RNA*”                                      |
|                                                                                                                                              | 7. ncRNA*                                                |
|                                                                                                                                              | 8. sncRNA*                                               |
|                                                                                                                                              | 9. #1 OR #2 OR #3 OR #4 OR #5 OR #6 OR #7 OR #8          |
|                                                                                                                                              | 10. “Embryo Implantation” [Mesh]                         |
|                                                                                                                                              | 11. “embryo quality”                                     |
|                                                                                                                                              | 12. "Pregnancy Outcome"[Mesh]                            |
|                                                                                                                                              | 13. #10 OR #11 OR #12                                    |
|                                                                                                                                              | 14. “embryo culture medi*”                               |
|                                                                                                                                              | 15. “spent culture medi*”                                |
|                                                                                                                                              | 16. “culture medi*”                                      |
|                                                                                                                                              | 17. “blastocyst culture medi*”                           |
|                                                                                                                                              | 18. “spent medi*”                                        |
|                                                                                                                                              | 19. “follicular fluid”                                   |
|                                                                                                                                              | 20. “plasma”                                             |
|                                                                                                                                              | 21. #14 OR #15 OR #16 OR #17 OR #18 OR #19 OR #20        |
|                                                                                                                                              | 22. #9 AND #13 AND #21                                   |
| <p>EMBASE via OVID<br/>Last search date: 31 July 2022</p>                                                                                    | 1. “untranslated RNA”/ or “non-coding RNA*”.tw.          |
|                                                                                                                                              | 2. microRNA/ or microRNA*.tw. or “circulating microRNA”/ |
|                                                                                                                                              | 3. “long untranslated RNA”/ or “long noncoding RNA*”.tw. |
|                                                                                                                                              | 4. #1 OR #2 OR #3                                        |
|                                                                                                                                              | 5. “embryo quality”.tw.                                  |
|                                                                                                                                              | 6. “embryo implantation”.tw.                             |
|                                                                                                                                              | 7. “pregnancy outcome”/                                  |
|                                                                                                                                              | 8. #5 OR #6 OR #7                                        |

|                                                                                                                                        |                                                       |
|----------------------------------------------------------------------------------------------------------------------------------------|-------------------------------------------------------|
|                                                                                                                                        | 9. “culture medium”/ or “embryo culture medi*”.tw.    |
|                                                                                                                                        | 10. “follicular fluid”.tw. or “ovary follicle fluid”/ |
|                                                                                                                                        | 11. plasma/ or “seminal plasma”/ or plasma.tw.        |
|                                                                                                                                        | 12. #9 OR #10 OR #11                                  |
|                                                                                                                                        | 13. #4 AND #8 AND #12                                 |
| <p>Web of Science<br/>(<a href="https://www.webofscience.com">https://www.webofscience.com</a>)<br/>Last search date: 31 July 2022</p> | 1. ALL= “untranslated RNA”                            |
|                                                                                                                                        | 2. ALL= “small untranslated RNA”                      |
|                                                                                                                                        | 3. ALL= microRNA*                                     |
|                                                                                                                                        | 4. ALL= “circulating microRNA*”                       |
|                                                                                                                                        | 5. ALL= “non-coding RNA*”                             |
|                                                                                                                                        | 6. ALL= “noncoding RNA*”                              |
|                                                                                                                                        | 7.ALL= ncRNA*                                         |
|                                                                                                                                        | 8. ALL= sncRNA*                                       |
|                                                                                                                                        | 9. #1 OR #2 OR #3 OR #4 OR #5 OR #6 OR #7 OR #8       |
|                                                                                                                                        | 10. ALL= “embryo implantation”                        |
|                                                                                                                                        | 11. ALL= “embryo quality”                             |
|                                                                                                                                        | 12. ALL= "pregnancy outcome"                          |
|                                                                                                                                        | 13. #10 OR #11 OR #12                                 |
|                                                                                                                                        | 14. ALL= “embryo culture medi*”                       |
|                                                                                                                                        | 15. ALL= “spent culture medi*”                        |
|                                                                                                                                        | 16. ALL= “culture medi*”                              |
|                                                                                                                                        | 17. ALL= “blastocyst culture medi*”                   |
|                                                                                                                                        | 18. ALL= “spent medi*”                                |
|                                                                                                                                        | 19. ALL= “follicular fluid”                           |
|                                                                                                                                        | 20. ALL= “plasma”                                     |
|                                                                                                                                        | 21. #14 OR #15 OR #16 OR #17 OR #18 OR #19 OR #20     |
|                                                                                                                                        | 22. #9 AND #13 AND #21                                |
