# Supplementary material for: Non-Coding RNAs as Biomarkers for Embryo Quality and Pregnancy Outcomes: A Systematic Review and Meta-Analysis
Source: MDPI journal article supplement (doi:10.3390/ijms24065751), 2023-03-17
Supplement: s1 [file s1]

**Table S2.** Inclusion and exclusion criteria based on Population, Intervention, Comparator, Outcome, and Study (PICOS) approach.

| Parameter    | Inclusion                                                                                                                                                                                                                                                                                                       | Exclusion                                                                                                |
|--------------|-----------------------------------------------------------------------------------------------------------------------------------------------------------------------------------------------------------------------------------------------------------------------------------------------------------------|----------------------------------------------------------------------------------------------------------|
| Population   | Infertile women undergoing IVF or ICSI                                                                                                                                                                                                                                                                          | Species other than humans and cell lines                                                                 |
| Intervention | Detection of sncRNAs in the extracellular environment                                                                                                                                                                                                                                                           | Detection of sncRNAs within cells or tissues                                                             |
| Comparator   | Expression of sncRNAs related to pregnancy outcomes or embryo quality:<br>Differential sncRNAs expression between pregnant and non-pregnant embryos<br>Differential sncRNAs expression between aneuploid and euploid embryos<br>Differential sncRNAs expression between embryos of different morphologic grades | Descriptive studies only analyze sncRNAs content in one single population, or studies without comparison |
| Outcomes     | sncRNAs as biomarkers for embryo quality or successful implantation                                                                                                                                                                                                                                             |                                                                                                          |
| Study design | Research article; Comparative study; Cross-sectional study; Retrospective study; Cohort study                                                                                                                                                                                                                   | Review article; Systematic reviews; Letters; Commentary articles; Conference abstract                    |

ICSI, intracytoplasmic sperm injection; IVF, in vitro fertilization; sncRNAs: small non-coding RNAs.
